# Supplementary material
Source: Frontiers journal article supplement (https://www.frontiersin.org/articles/504858)
Supplement: Table_1.DOCX [file Table_1.DOCX]

## Supplementary information

Table 1: Isotopic signatures (δ13C‰, δ15N‰) of potential sources ± standard deviation

|  | δ15N‰ | SD | δ13C‰ | SD |
| --- | --- | --- | --- | --- |
| Saltmarsh AGB (n = 13) | 2.31 | 1.67 | -24.57 | 4.32 |
| Saltmarsh BGB (n = 9) | 1.44 | 0.40 | -26.86 | 1.30 |
| Mangrove AGB (n = 13) | 4.25 | 1.11 | -26.29 | 0.89 |
| Mangrove BGB (n = 9) | 2.77 | 1.13 | -25.63 | 0.25 |
| Seagrass AGB (n = 10) | 4.77 | 0.80 | -9.39 | 0.99 |
| Seagrass BGB (n = 6) | 3.35 | 0.78 | -10.60 | 2.06 |
| Microphytobenthos (MPB) (n = 4) | 5.83 | 1.16 | -13.58 | 1.67 |
| SPOM Upper (n = 5) | 5.93 | 1.14 | -27.89 | 0.68 |
| SPOM Middle (n = 3) | 6.10 | 1.55 | -27.12 | 2.65 |
| SPOM Entrance (n = 5) | 6.94 | 1.79 | -19.86 | 4.70 |

Table 2: Above and belowground organic carbon stocks (mean ± SE) across habitats and transects

| Transect | Habitat | Aboveground organic C (t ha-1) | Belowground organic C (t ha-1) | Above and belowground organic C stocks (t C ha-1) |
| --- | --- | --- | --- | --- |
| Tairua Upper | Saltmarsh | 3.07 ± 0.29 | 77.03 ± 1.42 | 80.10 ± 1.55 |
|  | Mangrove | 5.16 ± 2.57 | 49.99 ± 4.99 | 55.15 ± 5.61 |
|  | Unvegetated | 0.00 ± 0.00 | 25.62 ± 2.27 | 25.62 ± 2.27 |
| Paunui | Saltmarsh | 2.32 ± 0.13 | 80.40 ± 4.79 | 82.72 ± 4.85 |
|  | Mangrove | 5.50 ± 4.10 | 38.49 ± 4.51 | 43.99 ± 0.55 |
|  | Seagrass | 0.03 ± 0.03 | 19.83 ± 2.74 | 19.86 ± 2.73 |
|  | Unvegetated | 0.00 ± 0.00 | 30.66 ± 5.51 | 30.66 ± 5.51 |
| Tairua Mid | Saltmarsh | 1.58 ± 0.10 | 105.63 ± 2.64 | 107.22 ± 2.74 |
|  | Mangrove | 2.51 ± 0.49 | 37.34 ± 7.35 | 39.86 ± 7.47 |
|  | Unvegetated | 0.00 ± 0.00 | 31.37 ± 2.30 | 31.37 ± 2.30 |
| Tairua Entrance | Seagrass | 0.14 ± 0.03 | 33.80 ± 5.98 | 33.94 ± 6.01 |
|  | Unvegetated | 0.00 ± 0.00 | 20.14 ± 3.03 | 20.14 ± 3.03 |
| All transects pooled | Saltmarsh | 2.33 ± 0.24 | 87.69 ± 4.80 | 90.01 ± 4.63 |
|  | Mangrove | 4.39 ± 1.48 | 41.94 ± 3.51 | 46.33 ± 3.54 |
|  | Seagrass | 0.09 ± 0.03 | 26.82 ± 4.29 | 26.90 ± 4.32 |
|  | Unvegetated | 0.00 ± 0.00 | 25.58 ± 2.04 | 25.58 ± 2.04 |

Table 3: PERMANOVA analysis of sediment characteristics and carbon stocks between habitats and sites. Bold: Pairwise post hoc tests were used to isolate differences between habitats, sites, and depth (p < 0.05). S = Saltmarsh, M = mangrove, SG = Seagrass, U = Unvegetated.

|  | Source | df | SS | MS | Pseudo-F | P(perm) | perms |  |
| --- | --- | --- | --- | --- | --- | --- | --- | --- |
| Sediment chlorophyll a | SITE | 3 | 15.064 | 5.0215 | 0.095783 | 0.963 | 998 |  |
|  | HABITAT | 3 | 976.79 | 325.6 | 6.2107 | 0.004 | 999 | MxU  MxSM |
|  | SITExHABITAT** | 5 | 957.78 | 191.56 | 3.6539 | 0.016 | 998 |  |
|  | Res | 27 | 1415.5 | 52.425 |  |  |  |  |
|  | Total | 38 | 3496.9 |  |  |  |  |  |
| Sediment silt and clay content | SITE | 3 | 275.54 | 91.847 | 0.70365 | 0.561 | 999 |  |
|  | HABITAT | 3 | 11919 | 3973 | 30.438 | 0.001 | 998 | MxU  MxSG  UxSM  SMxSG |
|  | SITExHABITAT** | 5 | 587.12 | 117.42 | 0.8996 | 0.531 | 999 |  |
|  | Res | 27 | 3524.3 | 130.53 |  |  |  |  |
|  | Total | 38 | 21937 |  |  |  |  |  |
| Sediment bulk density | SITE | 3 | 0.090316 | 0.030105 | 1.5526 | 0.215 | 998 |  |
|  | HABITAT | 3 | 3.4364 | 1.1455 | 59.075 | 0.001 | 999 | MxU  MxSM  MxSG  UxSM  UxSG  SMxSG |
|  | SITExHABITAT** | 5 | 0.16901 | 0.033803 | 1.7433 | 0.145 | 999 |  |
|  | Res | 27 | 0.52353 | 0.01939 |  |  |  |  |
|  | Total | 38 | 4.8117 |  |  |  |  |  |
| Above Ground OC | SITE | 3 | 10.232 | 3.4108 | 0.64716 | 0.59 | 999 |  |
|  | HABITAT | 3 | 101.65 | 33.883 | 6.4289 | 0.001 | 998 | MxU  UxSM  UxSG  SMxSG |
|  | SITExHABITAT** | 5 | 9.1947 | 1.8389 | 0.34892 | 0.909 | 999 |  |
|  | Res | 27 | 142.3 | 5.2704 |  |  |  |  |
|  | Total | 38 | 288.61 |  |  |  |  |  |
| Sediment OC | SITE | 3 | 510.52 | 170.17 | 2.9316 | 0.064 | 999 |  |
|  | HABITAT | 3 | 18995 | 6331.8 | 109.08 | 0.001 | 997 | MxU  MxSM  MxSG  UxSM  SMxSG |
|  | SITExHABITAT** | 5 | 1844.5 | 368.89 | 6.355 | 0.002 | 999 |  |
|  | Res | 27 | 1567.3 | 58.048 |  |  |  |  |
|  | Total | 38 | 28050 |  |  |  |  |  |
| Total OC | SITE | 3 | 388.17 | 129.39 | 2.3185 | 0.091 | 999 |  |
|  | HABITAT | 3 | 20019 | 6673.1 | 119.57 | 0.001 | 997 | MxU  MxSM  MxSG  UxSM  SMxSG |
|  | SITExHABITAT** | 5 | 1931.7 | 386.34 | 6.9228 | 0.001 | 998 |  |
|  | Res | 27 | 1506.8 | 55.807 |  |  |  |  |
|  | Total | 38 | 29743 |  |  |  |  |  |
| OC with depth | Source | df | SS | MS | Pseudo-F | P(perm) | perms |  |
|  | SITE | 3 | 0.00010351 | 3.4503E-05 | 1.0569 | 0.388 | 999 |  |
|  | Habitat | 3 | 0.0042323 | 0.0014108 | 43.215 | 0.001 | 998 |  |
|  | Depth | 6 | 0.0038996 | 0.00064994 | 19.909 | 0.001 | 999 |  |
|  | SITExHabitat** | 5 | 0.00038282 | 7.6565E-05 | 2.3454 | 0.037 | 997 |  |
|  | SITExDepth | 18 | 0.00021401 | 1.189E-05 | 0.36421 | 0.99 | 997 |  |
|  | HabitatxDepth | 18 | 0.0033784 | 0.00018769 | 5.7495 | 0.001 | 996 |  |
|  | SITExHabitatxDepth** | 30 | 0.00090856 | 3.0285E-05 | 0.92772 | 0.628 | 999 |  |
|  | Res | 189 | 0.0061699 | 3.2645E-05 |  |  |  |  |
|  | Total | 272 | 0.020771 |  |  |  |  |  |
